# Supplementary material
Source: publisher figshare collection journal article supplement (https://frontiersin.figshare.com/ndownloader/files/18737852)
Supplement: Supplementary file [file 18737852]

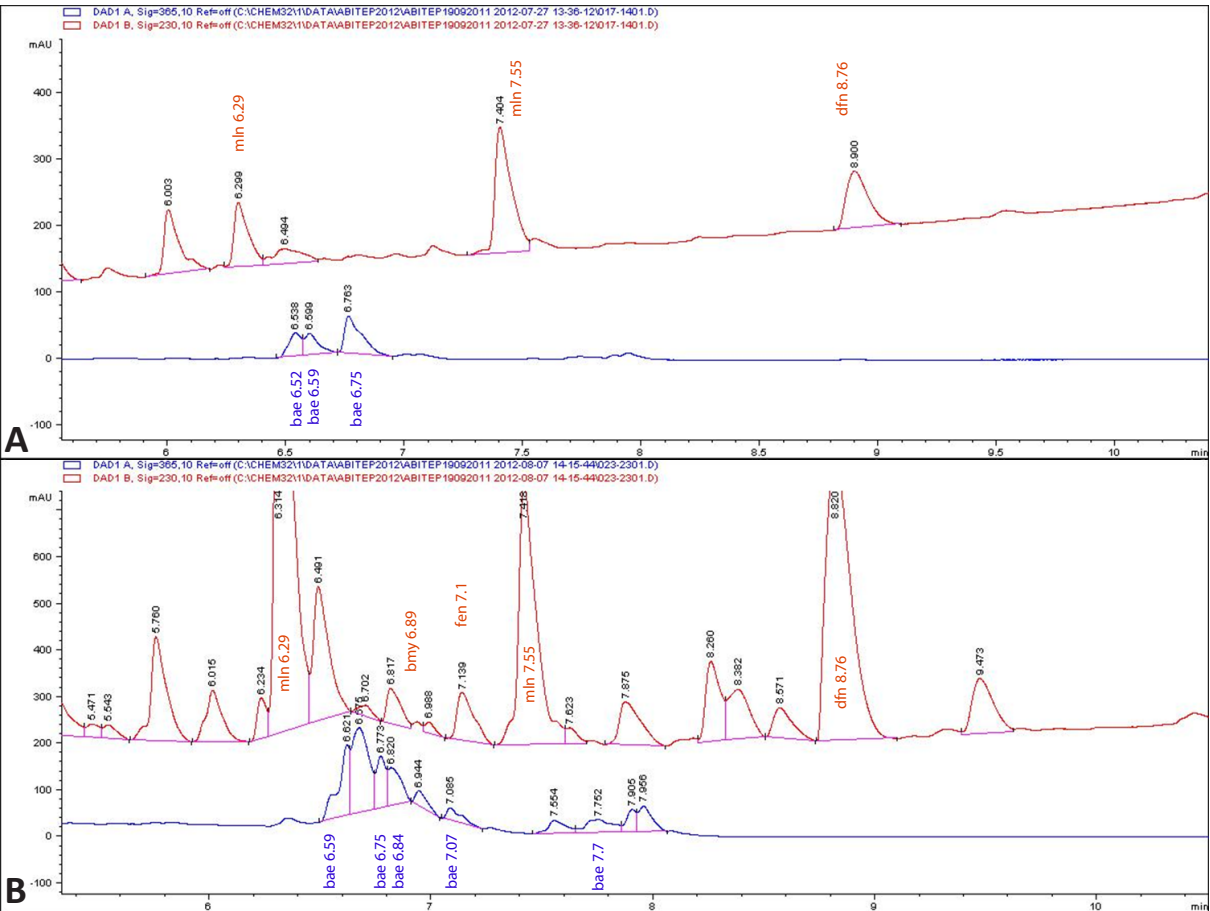

**Supplementary Figure 1 | HPLC peaks for strain UCMB5007 A) 24 h cultivation; B) 48 h cultivation.** OD values were measured at two wavelengths, 365 nm and 230 nm, depicted by blue and red lines, respectively. Characteristic peaks and the time of elution in seconds for bacillomycin (bmy), fengycin (fen), bacillaene (bae), diffididin (dif) and macrolactin (mln) are depicted.
